# Supplementary material for: Synthesis and properties of hollow Fe3O4@Au hybrid nano-structures for T1–T2 MR imaging and a combination of magnetic and photo-induced heating
Source: Royal Society of Chemistry journal article supplement (doi:10.1039/d2nj04880a), 2023-01-01
Supplement: d2nj04880a1.pdf [file d2nj04880a1.pdf]

## Supporting Information

### Synthesis and properties of hollow Fe<sub>3</sub>O<sub>4</sub>@Au hybrid nano-structures for T<sub>1</sub>-T<sub>2</sub> MR imaging and combination of magnetic and photo-induced heating

Nguyen T. N. Linh<sup>a</sup>, Ngo T. Dung<sup>b,\*</sup>, Le T. T. Tam<sup>b</sup>, Le T. Tam<sup>c</sup>, Nguyen P. Hung<sup>a</sup>, Nguyen D. Vinh<sup>a</sup>, Ngo T. Ha<sup>a</sup>, Pham. H. Nam<sup>e</sup>, Le V. Thanh<sup>f</sup>, Nguyen V. Dong<sup>f</sup>, Le G. Nam<sup>f</sup>, Nguyen V. Dang<sup>a</sup>, Nguyen X. Phuc<sup>e</sup>, Le D. Tung<sup>g,h</sup>, Nguyen T. K. Thanh<sup>g,h</sup> and Le T. Lu<sup>b,d,\*</sup>

<sup>a</sup>Thai Nguyen University of Sciences, Tan Thinh Ward, Thai Nguyen City, Thai Nguyen, Vietnam.

<sup>b</sup>Institute for Tropical Technology, Vietnam Academy of Science and Technology (VAST), 18 Hoang Quoc Viet, Hanoi, Vietnam.

<sup>c</sup>Vinh University, 182 Le Duan Street, Vinh City, Nghe An, Vietnam.

<sup>d</sup>Graduate University of Science and Technology, VAST, 18 Hoang Quoc Viet, Hanoi, Vietnam.

<sup>e</sup>Institute of Materials Science, VAST, 18 Hoang Quoc Viet, Hanoi, Vietnam.

<sup>f</sup>Vinh International Hospital, 99 Pham Dinh Toai Street, Vinh City, Nghe An, Vietnam

<sup>g</sup>Biophysics Group, Department of Physics and Astronomy, University College London, Gower Street, London WC1E 6BT, U

<sup>h</sup>UCL Healthcare Biomagnetics and Nanomaterials Laboratories, University College London, 21 Albemarle Street, London W1S 4BS, UK.

**Table S1.** Influence of synthesis conditions on the Fe<sub>3</sub>O<sub>4</sub> particle size.

| Fe(acac) <sub>3</sub> (mM) | OA (mM) | OLA (mM) | OCD-ol (mM) | T (°C) | T (min) | Size (nm)  |
|----------------------------|---------|----------|-------------|--------|---------|------------|
| 190                        | 744     | 744      | 300         | 295    | 10      | 3.4 ± 0.5  |
|                            |         |          |             |        | 30      | 6.7 ± 0.7  |
|                            |         |          |             |        | 60      | 8.1 ± 0.7  |
|                            |         |          |             |        | 120     | 13.9 ± 1.1 |
| 190                        | 558     | 558      | 300         | 295    | 60      | 6.3 ± 0.9  |
|                            | 744     | 744      |             |        |         | 8.1 ± 0.7  |
|                            | 930     | 930      |             |        |         | 14.7 ± 1.3 |
| 190                        | 744     | 744      | 300         | 295    | 30      | 6.7 ± 0.7  |
| 673                        |         |          |             |        |         | 7.2 ± 0.9  |
| 920                        |         |          |             |        |         | 14.3 ± 1.5 |

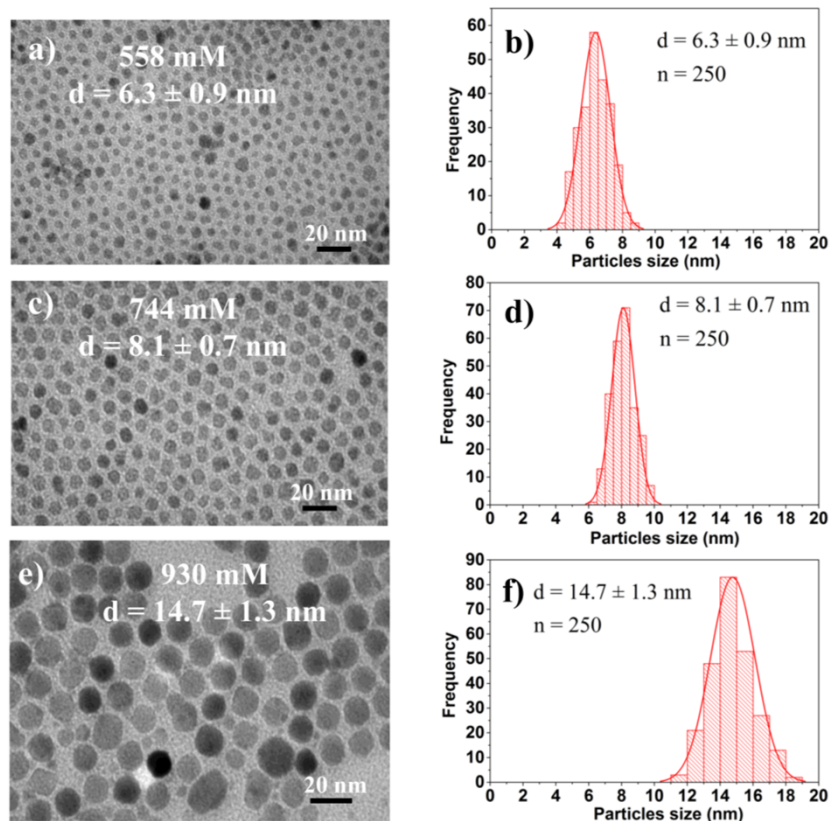

**Fig. S1** TEM images and their corresponding size distribution histograms of  $\text{Fe}_3\text{O}_4$  nanoparticles synthesised with different surfactant concentrations: 558 mM (a, b), 744 mM (c, d), 930 mM (e, f).

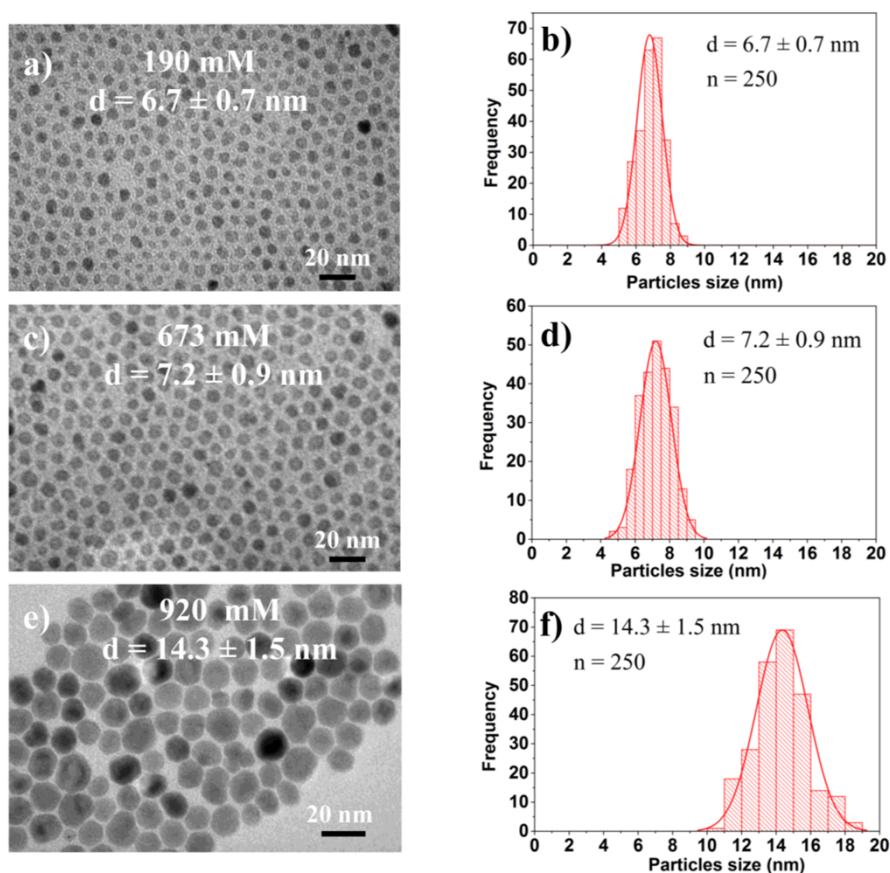

**Fig. S2** TEM images and their corresponding size distribution histograms of  $\text{Fe}_3\text{O}_4$  nanoparticles synthesised with different precursor concentrations: 190 mM (a, b), 673 mM (c, d), 920 mM (e, f).

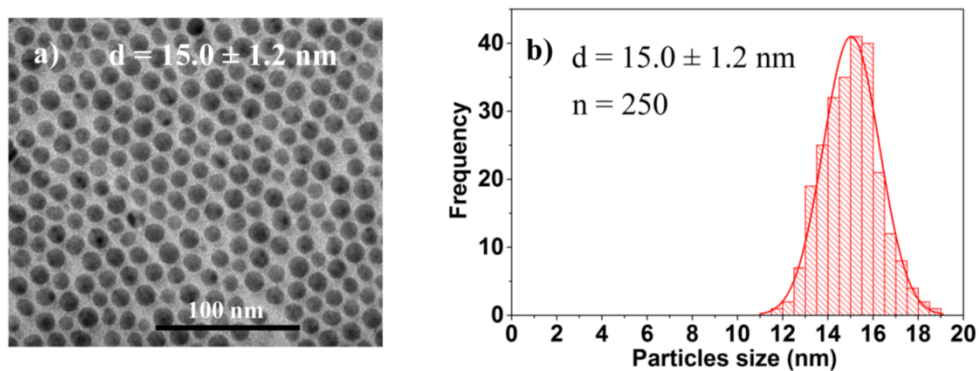

**Fig. S3** TEM image and size distribution histogram of Ag nanoparticles synthesised under similar conditions but without  $\text{Fe}_3\text{O}_4$  NPs at reaction time of 60 min.

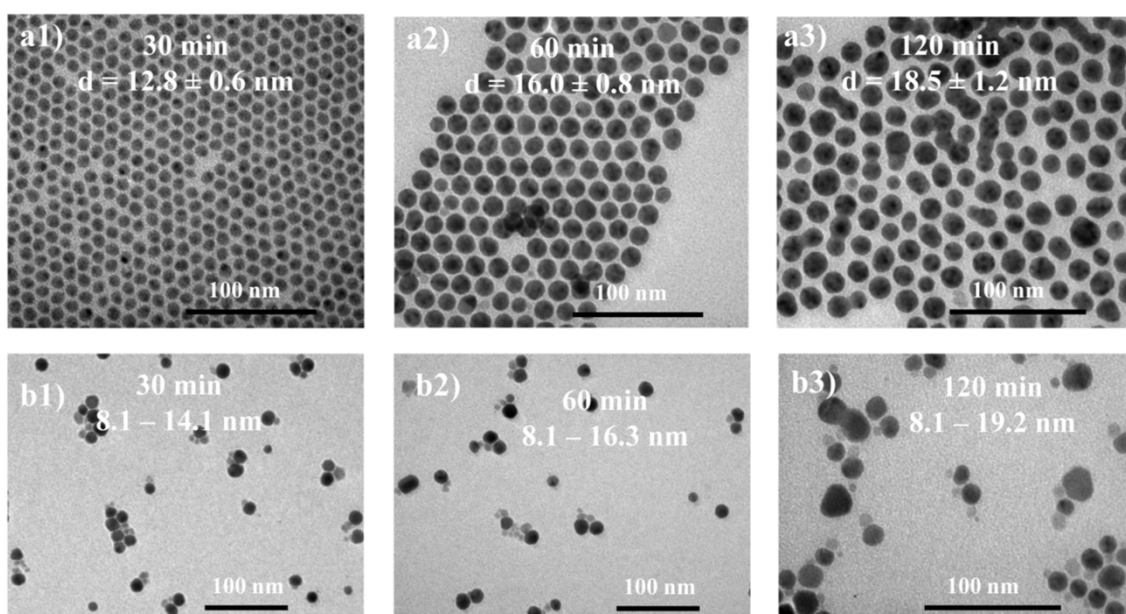

**Fig. S4** TEM images of HNPs synthesised with  $\text{Fe}_3\text{O}_4$  seeds of 8.1 nm at different reaction times: (a1-a3) core-shell  $\text{Fe}_3\text{O}_4$ @Ag HNPs and (b1-b3) dumbbell-like  $\text{Fe}_3\text{O}_4$ -Ag HNPs.

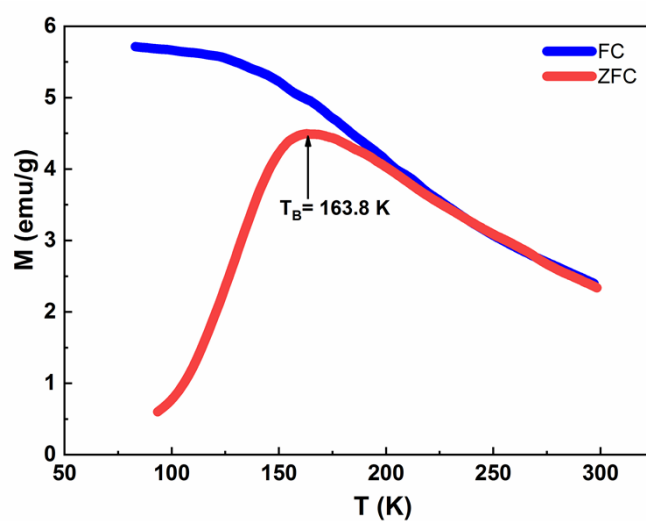

**Fig. S5** Temperature dependence of magnetization (in ZFC and FC regimes at a magnetic field of 8 kA/m) for  $\text{Fe}_3\text{O}_4$  NPs ( $8.1 \pm 0.7$  nm).

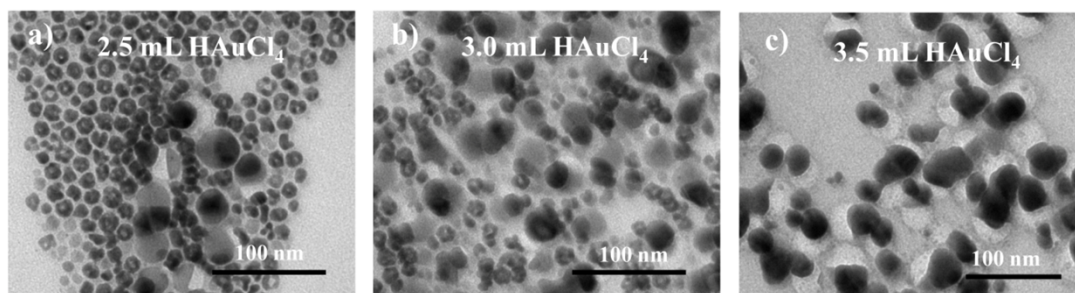

**Fig. S6** TEM images of  $\text{Fe}_3\text{O}_4@Au$  h-NPs prepared at different  $\text{HAuCl}_4$  solution volumes: 2.5 (a), 3.0 (b) and 3.5 mL (c) showing the formation of solid NPs.

**Table S2.** Effect of the amount of  $\text{HAuCl}_4$  solution on the size and morphology of h-NPs.

| The volumes of $\text{HAuCl}_4$ solution (mL) | The particle size (nm) | Morphology                                              |
|-----------------------------------------------|------------------------|---------------------------------------------------------|
| 0                                             | $16.0 \pm 0.8$         | Solid sphere<br>( $\text{Fe}_3\text{O}_4@Ag$ templates) |
| 0.5                                           | $16.1 \pm 0.8$         | Solid sphere                                            |
| 1.0                                           | $16.4 \pm 0.9$         | Hollow sphere                                           |
| 1.5                                           | $16.6 \pm 1.0$         | Hollow sphere                                           |
| 2.0                                           | $17.0 \pm 1.1$         | Hollow sphere                                           |
| 2.5                                           | $18.8 \pm 2.1$         | Hollow sphere and solid sphere                          |
| 3.0                                           | $26.3 \pm 3.4$         | Hollow sphere and solid sphere                          |
| 3.5                                           | $33.2 \pm 5.7$         | Solid sphere                                            |

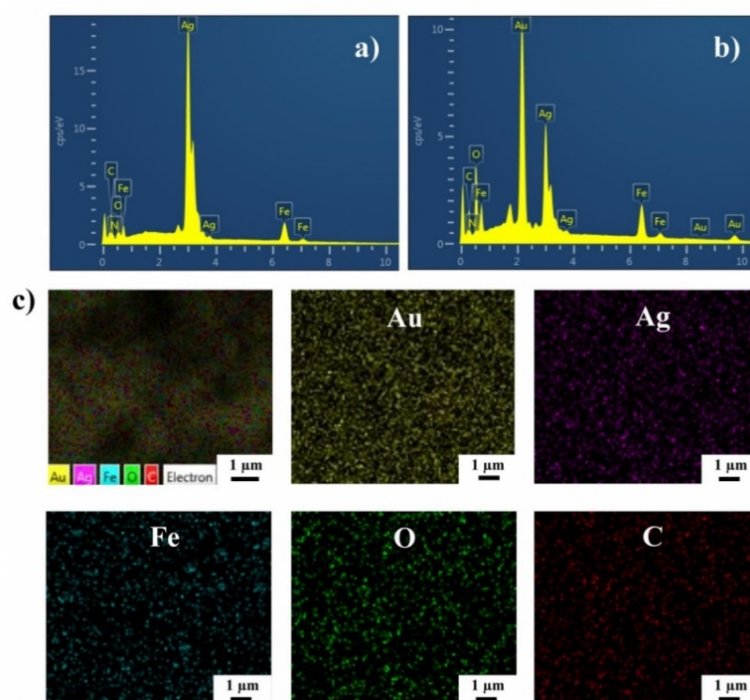

**Fig. S7.** EDS spectra of  $\text{Fe}_3\text{O}_4@Ag$  nanotemplates (a) and hollow  $\text{Fe}_3\text{O}_4@Au$  h-NPs (b); and EDS elemental mapping of hollow  $\text{Fe}_3\text{O}_4@Au$  h-NPs (c) prepared at 2.0 mL  $\text{HAuCl}_4$  solution.

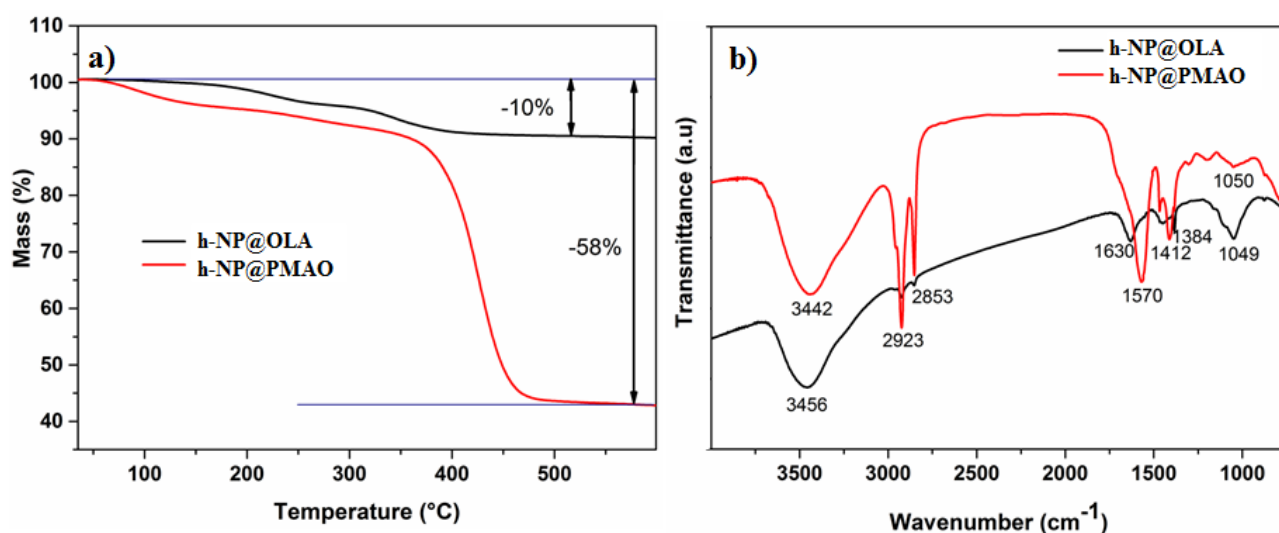

Fig. S8. a) TGA scans and b) FT-IR spectra of OLA and PMAO encapsulated hollow  $\text{Fe}_3\text{O}_4@Au$  h-NPs.

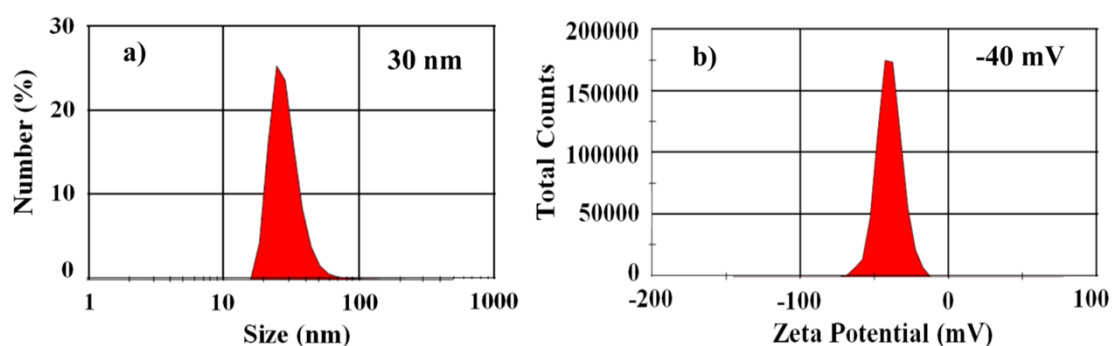

Fig. S9 Hydrodynamic size distribution (a) and zeta potential (b) of PMAO encapsulated hollow  $\text{Fe}_3\text{O}_4@Au$  HNPs.

Table S3. MRI relaxivities of the commercial gadolinium-(GBCAs), iron oxide nanoparticle-based contrast agents and the hollow  $\text{Fe}_3\text{O}_4@Au$  h-NPs.

| Brand Name                                                | Ligand shell/Generic Name (INN)     | Core size (nm) | Overall size (nm) | $r_1$ ( $\text{mM}^{-1} \text{s}^{-1}$ ) | $r_2$ ( $\text{mM}^{-1} \text{s}^{-1}$ ) | $r_2/r_1$   | Company/refs                          |
|-----------------------------------------------------------|-------------------------------------|----------------|-------------------|------------------------------------------|------------------------------------------|-------------|---------------------------------------|
| <b>Hollow <math>\text{Fe}_3\text{O}_4@Au</math> h-NPs</b> | <b>PMAO</b>                         | <b>17.0</b>    | <b>28.84</b>      | <b>8.47</b>                              | <b>74.45</b>                             | <b>8.79</b> | <b>Current study</b>                  |
| Dotarem®                                                  | Gadoterate meglumine (Gd-DOTA)      | -              | -                 | 3.6 (3.4-3.8)                            | 4.3 (3.4-5.2)                            | 1.19        | Belgium for Guerbet <sup>1</sup>      |
| Magnevist®                                                | Gadopentetate dimeglumine (Gd-DTPA) | -              | -                 | 4.1 (3.9-4.3)                            | 4.6 (3.8-5.4)                            | 1.12        | Bayer Schering (Germany) <sup>1</sup> |
| MultiHance®                                               | Gadobenate dimeglumine (Gd-BOPTA)   | -              | -                 | 6.3 (6.0-6.6)                            | 8.7 (7.8-9.6)                            | 1.38        | Bracco <sup>1</sup>                   |
| Omniscan®                                                 | Gadodiamide (Gd-DTPA BMA)           | -              | -                 | 4.3 (4.0-4.6)                            | 5.2 (4.2-6.2)                            | 1.21        | GE Healthcare <sup>1</sup>            |
| ProHance®                                                 | Gadoteridol (Gd-HPDO3A)             | -              | -                 | 4.1 (3.9-4.3)                            | 5.0 (4.2-5.8)                            | 1.22        | Bracco <sup>1</sup>                   |

|                                                  |                                                                                         |     |      |                  |                                          |       |                                              |
|--------------------------------------------------|-----------------------------------------------------------------------------------------|-----|------|------------------|------------------------------------------|-------|----------------------------------------------|
| Gadovist®                                        | Gadobutrol<br>(Gd-DO3A-butrol)                                                          | -   | -    | 5.2<br>(4.9–5.5) | 6.1<br>(5.2–7.0)                         | 1.17  | Bayer<br>Schering<br>(Germany) <sup>1</sup>  |
| Teslascan®                                       | Mangafodipir<br>trisodium (Mn-<br>DPDP)                                                 | -   | -    | 1.6<br>(1.5–1.7) | 2.1<br>(1.4–2.8)                         | 1.31  | Amersham <sup>1</sup>                        |
| Ferumoxtran<br>(Sinerem)                         | Dextran + citrate                                                                       | 4.5 | 34   | 5.0              | 66.0                                     | 13.2  | <sup>2</sup>                                 |
| VSOP-C184                                        | Citrate                                                                                 | 8.6 | 19   | 8.0              | 34                                       | 4.25  | <sup>3</sup>                                 |
| Ferumoxytol®                                     | Dextran<br>(C7228)                                                                      | 6.7 | 35   | 7.5              | 92                                       | 12.26 | AMAG<br>Pharma-<br>ceutical Inc <sup>4</sup> |
| Resovist®                                        | Ferucarbotran<br>(SHU 555 A)<br>Carboxydextran                                          |     | 60   | 7.4              | 151                                      | 20.40 | Schering <sup>1</sup>                        |
| Feridex/Endore<br>m®                             | Ferumoxide<br>(AMI-25) Dextran                                                          | 4.5 | 160  | 10.1             | 120                                      | 11.88 | Berlex/Guer<br>bet <sup>5</sup>              |
| Ferucarbotran®/<br>Supravist                     | Ferucarbotran<br>(SHU555C)<br>Dextran                                                   | 3-5 | 21   | 7.3              | 57                                       | 7.81  | Schering <sup>6</sup>                        |
| PEG (5) – BP -<br>USPIO                          | PEG-<br>bisphosphonate <sup>b</sup>                                                     | 5.5 | 23   | 9.5<br>(3.0 T)   | 28.2<br>(3.0 T)                          | 2.97  | <sup>3</sup>                                 |
| ESION                                            | PEG-phosphine<br>oxide ( $\gamma$ -Fe <sub>2</sub> O <sub>3</sub> )                     | 2.2 | 15   | 4.8<br>(3.0 T)   | 29.2<br>(3.0 T)                          | 6.08  | <sup>7</sup>                                 |
| USPIO                                            | PEG-phosphine<br>oxide (Fe <sub>3</sub> O <sub>4</sub> )                                | 12  | -    | 2.37<br>(3.0 T)  | 58.8<br>(3.0 T)                          | 24.81 | <sup>7</sup>                                 |
| GdIO                                             | Dopaminesulfona<br>te<br>Fe <sub>3</sub> O <sub>4</sub> +Gd <sub>2</sub> O <sub>3</sub> | 4.8 | 6.50 | 7.85<br>(0.5 T)  | 41.14<br>(0.5 T)                         | 5.24  | <sup>8</sup>                                 |
| MnMEIO                                           | 2,3-<br>dimercaptosuc-<br>cnic acid (DMSA)<br>MnFe <sub>2</sub> O <sub>4</sub>          | 12  | -    | -                | 358                                      | -     | <sup>9</sup>                                 |
| NiMEIO                                           | 2,3-<br>dimercaptosuc-<br>cnic acid (DMSA)<br>NiFe <sub>2</sub> O <sub>4</sub>          | -   | -    | -                | 152                                      | -     | <sup>9</sup>                                 |
| Au-Fe <sub>3</sub> O <sub>4</sub><br>heterodimer | -                                                                                       | -   | 30.4 | -                | 245 (3.0T),<br>723 HU at<br>100 mM<br>Au | -     | <sup>10</sup>                                |
| F-AuNC@ Fe <sub>3</sub> O <sub>4</sub>           | Au nanocages<br>Folic acid<br>functionalized                                            | 2.2 | 110  | 6.26             | 28.11                                    | 4.49  | <sup>11</sup>                                |

<sup>b</sup>1,2-distearoyl-sn-glycero-3-phosphoethanolamine-N-[methoxy(polyethylene glycol)-2000].

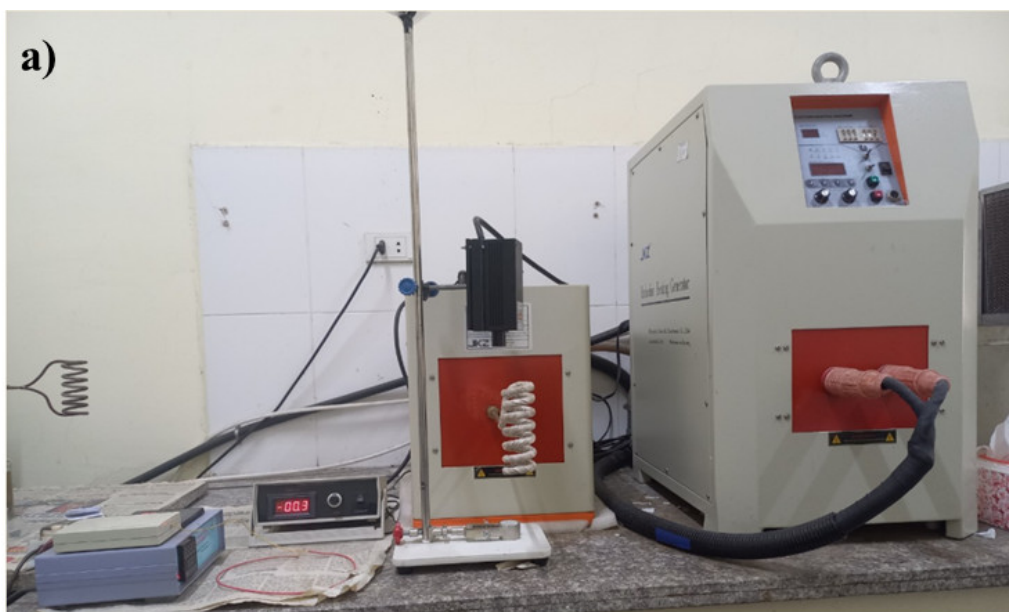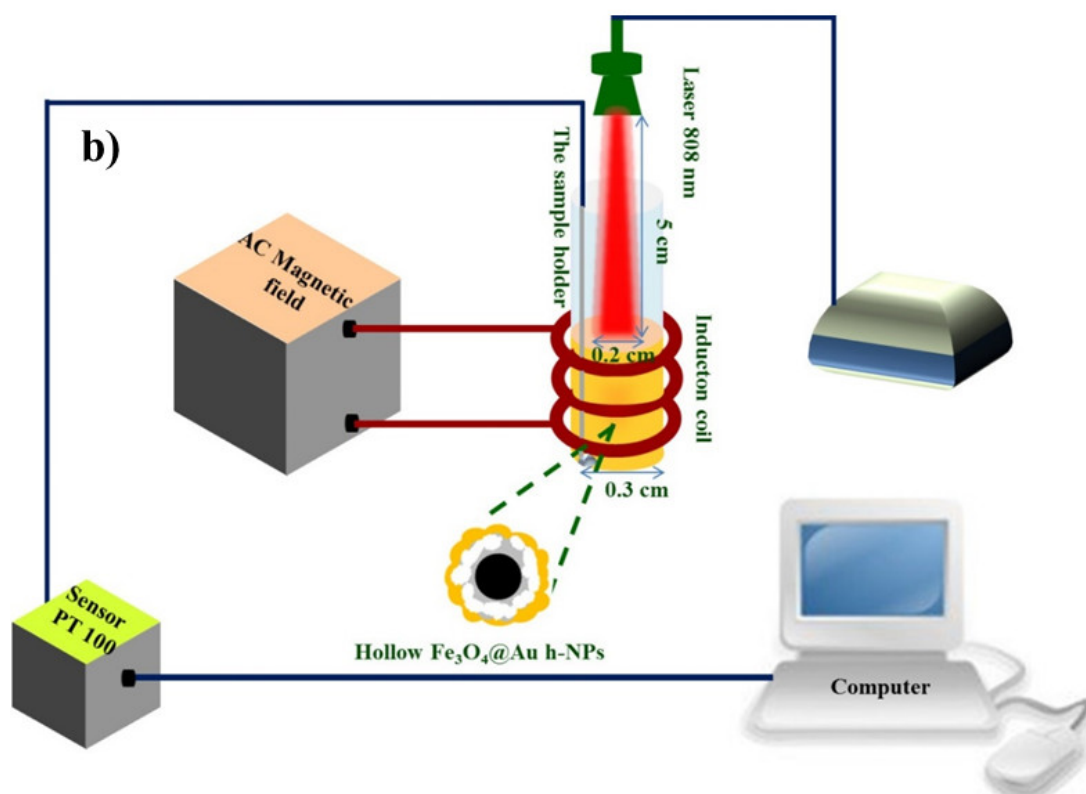

**Fig. S10** The magnetic and photoinduced heating experiment (a) and schematic diagram (b)

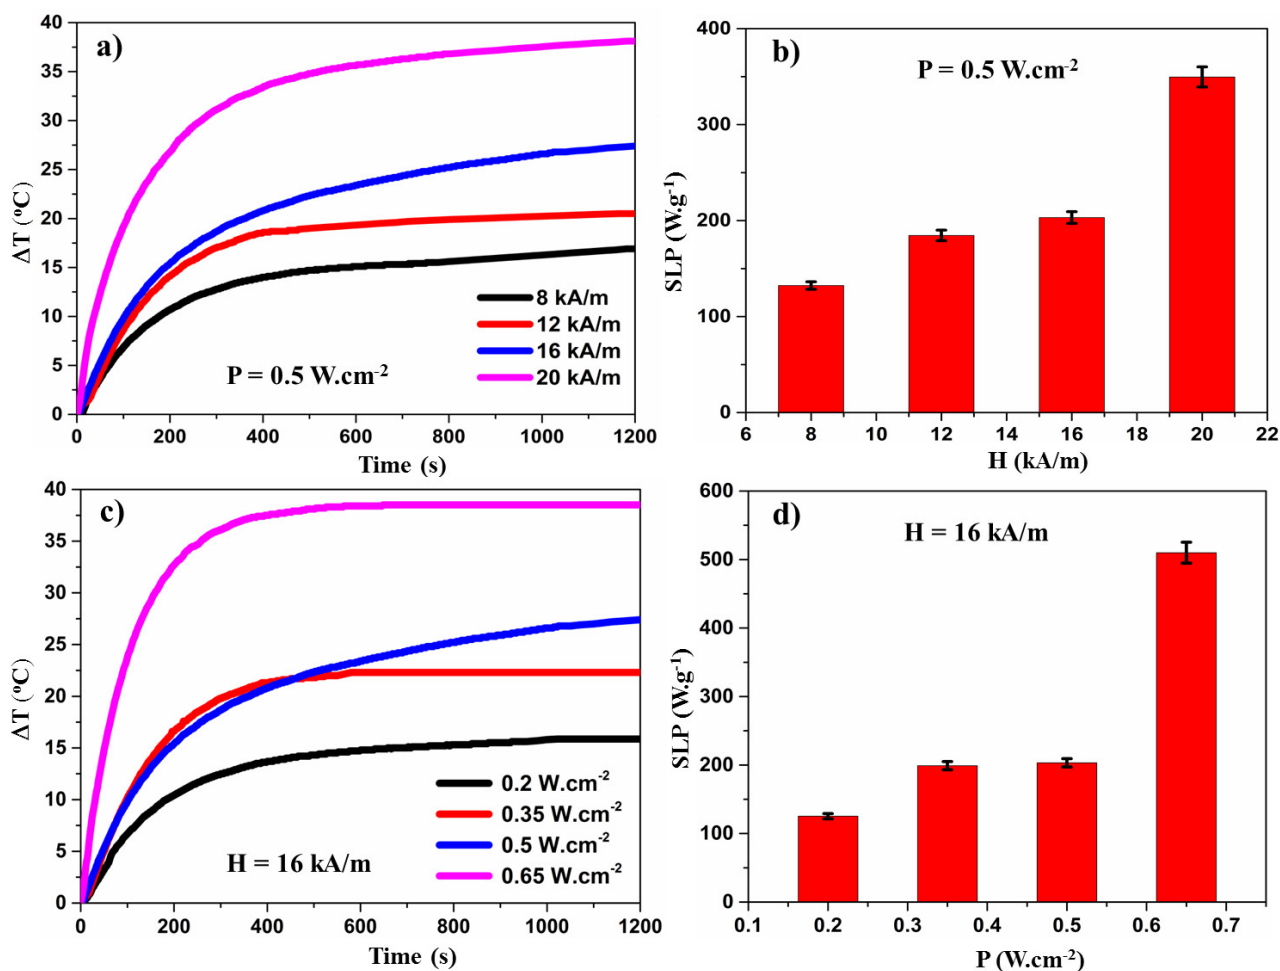

**Fig. S11** The heating curves (a), and the corresponding SLP values (b) for the hollow  $\text{Fe}_3\text{O}_4@Au$  h-NPs solutions under different applied fields (from 8 to 20 kA/m) at a constant frequency of 450 kHz and a laser power density  $0.5 \text{ W.cm}^{-2}$ . The heating curves (c), and the corresponding SLP values (d) for the h-NPs solution under a constant applied field of 16 kA/m at a frequency 450 kHz and different power densities (from 0.2 to  $0.65 \text{ W.cm}^{-2}$ ).

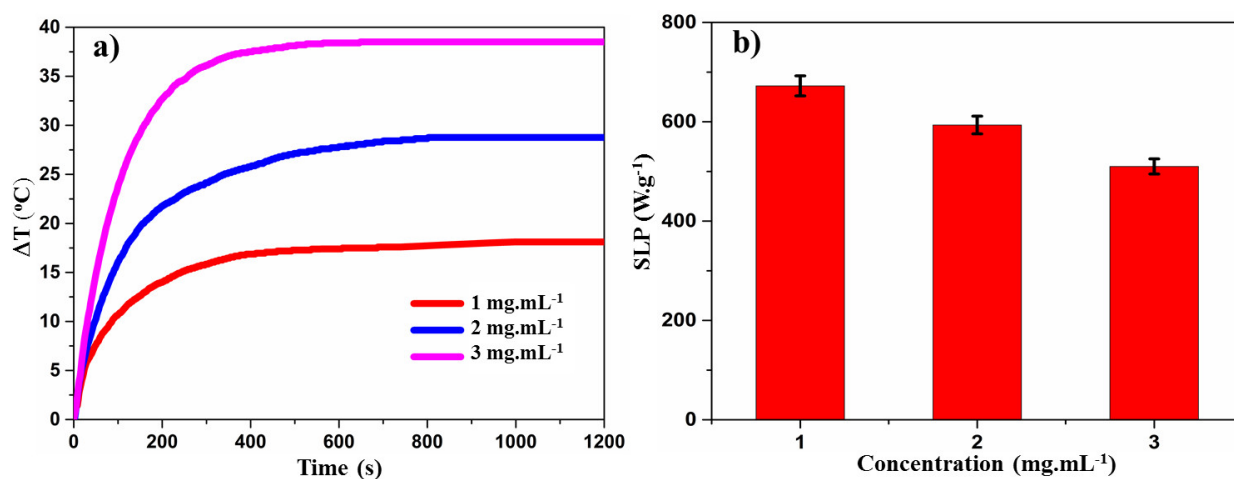

**Fig. S12** The heating curves (a), and the corresponding SLP values (b) for the hollow  $\text{Fe}_3\text{O}_4@Au$  h-NPs solutions at different concentrations under an applied field of 16 kA/m at a frequency 450 kHz and a laser power density  $0.65 \text{ W.cm}^{-2}$



## References

- 1 M. Rohrer, H. Bauer, J. Mintorovitch, M. Requardt and H.-J. Weinmann, *Invest. Radiol.*, 2005, **40**, 715-724.
- 2 M. F. Casula, P. Floris, C. Innocenti, A. Lascialfari, M. Marinone, M. Corti, R. A. Sperling, W. J. Parak and C. Sangregorio, *Chem. Mater.*, 2010, **22**, 1739-1748.
- 3 L. Sandiford, A. Phinikaridou, A. Protti, L. K. Meszaros, X. Cui, Y. Yan, G. Frodsham, P. A. Williamson, N. Gaddum, R. M. Botnar, P. J. Blower, M. A. Green, and R. T. M. de Rosales, *ACS Nano*, 2013, **7**, 500-512.
- 4 W. Li, S. Tutton, A. T. Vu, L. Pierchala, B. S. Y. Li, J. M. Lewis, P. V. , and R. R. Edelman, *J. Magn. Reson. Imaging*, 2005, **21**, 46-52.
- 5 D. L. J. Thorek, A. K. Chen, J. Czupryna and A. Tsourkas, *Ann. Biomed. Eng.*, 2006, **34**, 23-38.
- 6 N. Chan, M. Laprise-Pelletier, P. Chevallier, A. Bianchi, M. A. Fortin, and J. K. Oh, *Biomacromolecules*, 2014, **15**, 2146-2156.
- 7 B. H. Kim, N. Lee, H. Kim, K. An, Y. Il Park, Y. Choi, K. Shin, Y. Lee, S. G. Kwon, H. B. Na, J.-G. Park, T.-Y. Ahn, Y.-W. Kim, W. K. Moon, S. H. Choi and T. Hyeon, *J. Am. Chem. Soc.*, 2011, **133**, 12624-12631.
- 8 Z. Zhou, L. Wang, X. Chi, J. Bao, L. Yang, W. Zhao, Z. Chen, X. Wang, X. Chen and J. Gao, *ACS nano*, 2013, **7**, 3287-3296.
- 9 J. H. Lee, Y. M. Huh, Y. W. Jun, J. W. Seo, J. T. Jang, H. T. Song, S. Kim, E. J. Cho, H. G. Yoon, J. S. Suh and J. Cheon, *Nat. Med.*, 2007, **13**, 95-99.
- 10 D. Kim, M. K. Yu, T. S. Lee, J. J. Park, Y. Y. Jeong, and S. Jon, *Nanotechnology*, 2011, **22**, 155101-155107.
- 11 G. Wang, W. Gao, X. Zhang and X. Mei, *Sci. Rep.*, 2016, **6**, 28258-28267.
